# Supplementary material for: Evaluation of Tannin Extracts, Leonardite and Tributyrin Supplementation on Diarrhoea Incidence and Gut Microbiota of Weaned Piglets
Source: MDPI journal article supplement (doi:10.3390/ani11061693), 2021-06-06
Supplement: s1 [file s1]

## Supplementary materials

**Supplementary Table 1.** Chemical composition of experimental diets: CTRL (basal diet) and MIX (basal diet supplemented with 0.75% of Quebracho and Chestnut tannin extracts, 0.25% of leonardite, 0.20% of tributyrin).

| Analyte | CTRL  | MIX   |
|---------|-------|-------|
| DM      | 90.89 | 91.01 |
| CP      | 18.82 | 18.43 |
| EE      | 4.38  | 4.58  |
| CF      | 3.96  | 3.58  |
| Ashes   | 5.05  | 4.93  |

DM: dry matter; CP: crude protein; EE: ether extract; CF: crude fiber.

All values are expressed as percentage as fed basis (%).

CTRL: control group; MIX: treatment group.

**Supplementary Table 2.** Zootechnical performance of the experimental trial (from day 0 to 28) divided by control (CTRL) and treatment (MIX) group.

|                   | CTRL  | MIX   | SEM± | Trt    | P-values |            |
|-------------------|-------|-------|------|--------|----------|------------|
|                   |       |       |      |        | Time     | Trt x Time |
| <b>BW, kg</b>     |       |       |      | 0.8789 | < 0.0001 | 0.4992     |
| d 0               | 7.46  | 7.50  | 0.20 |        |          |            |
| d 7               | 8.34  | 8.27  | 0.20 |        |          |            |
| d 14              | 10.05 | 9.97  | 0.20 |        |          |            |
| d 21              | 12.30 | 12.43 | 0.20 |        |          |            |
| d 28              | 14.10 | 14.28 | 0.20 |        |          |            |
| <b>ADFI, kg/d</b> |       |       |      | 0.1966 | < 0.0001 | 0.2433     |
| d 0-7             | 0.268 | 0.202 | 0.03 |        |          |            |
| d 7-14            | 0.490 | 0.526 | 0.03 |        |          |            |
| d 14-21           | 0.566 | 0.519 | 0.03 |        |          |            |
| d 21-28           | 0.656 | 0.575 | 0.03 |        |          |            |
| <b>ADG, kg/d</b>  |       |       |      | 0.4787 | < 0.0001 | 0.3804     |
| d 0-7             | 0.096 | 0.088 | 0.01 |        |          |            |
| d 7-14            | 0.244 | 0.243 | 0.01 |        |          |            |
| d 14-21           | 0.320 | 0.353 | 0.01 |        |          |            |
| d 21-28           | 0.363 | 0.368 | 0.01 |        |          |            |
| <b>FCR, kg/kg</b> |       |       |      | 0.6895 | 0.0003   | 0.7659     |
| d 0-7             | 2.76  | 2.80  | 0.25 |        |          |            |
| d 7-14            | 2.00  | 2.19  | 0.25 |        |          |            |
| d 14-21           | 1.77  | 1.51  | 0.25 |        |          |            |
| d 21-28           | 1.84  | 1.59  | 0.25 |        |          |            |

Data are expressed as least square means (LSMEANS) and standard error of the means (SEM).

BW: body weight; ADG: average daily gain; ADFI: average daily feed intake; FRC: feed conversion rate; CTRL: control group; MIX: treatment group supplemented with 0.75% tannin extract, 0.25% leonardite and 0.20% tributyrin in the diet.

**Supplementary Table 3.** Mean values of faecal VFA proportion of tannin extracts, leonardite and tributyrin supplementation (MIX) and control (CTRL) groups.

|         | Acetate<br>mmol % ± SD | Propionate<br>mmol % ± SD | Isobutyrate<br>mmol % ± SD | Butyrate<br>mmol % ± SD | Isovalerate<br>mmol % ± SD | Valerate<br>mmol % ± SD |
|---------|------------------------|---------------------------|----------------------------|-------------------------|----------------------------|-------------------------|
| CTRL    | 56.38±5.02             | 21.69±1.55                | 2.08±0.75                  | 13.13±2.65              | 3.23±1.33                  | 2.85±0.93               |
| MIX     | 59.07±3.71             | 21.38±1.26                | 1.92±0.56                  | 11.43±3.05              | 2.90±0.94                  | 2.76±0.76               |
| p-value | 0.1487                 | 0.5962                    | 0.5598                     | 0.1591                  | 0.4901                     | 0.5892                  |

CTRL: control group; MIX: treatment group supplemented with 0.75% tannin extract, 0.25% leonardite and 0.20% tributyrin in the diet; VFA: volatile fatty acids.
